# Supplementary material
Source: PubMed Central journal article supplement (PMC2945587)
Supplement: supp_M110.138370_jbc.M110.138370-1.pdf [file supp_M110.138370_jbc.M110.138370-1.pdf]

## Supplemental Data

### **Murine protein serine/threonine kinase 38 stimulates TGF- $\beta$ signaling in a kinase-dependent manner via direct phosphorylation of Smad proteins**

Hyun-A Seong, Haiyoung Jung, and Hyunjung Ha

**Generation of an Inducible MPK38(KD) Cell Line**—An inducible MPK38 shRNA HaCaT cell line [MPK38(KD)] was generated using the following oligonucleotides as described previously (25). The double-stranded oligonucleotides (forward, 5'-TCGAGGCAGGCAGACAATG GAGGATTTCAAGAGAATCCTCCATTGTCTGCCTGCTTTTTTA-3'; reverse, 5'-AGCTTA AAAAAGCAGGCAGACAATGGAGGATTCTCTTCAAATCCTCCATTGTCTGCCTGCC-3'; MPK38 sequence underlined) were cloned into the pSingle-tTS-shRNA vector (Clontech). HaCaT cells were transfected with pSingle-tTS-shRNA harboring MPK38-specific shRNA or pSingle-tTS-shRNA empty vector using WelFect-Ex<sup>TM</sup> Plus (WelGENE, Daegu, Korea). Inducible MPK38(KD) stable clones were screened in the presence of 480  $\mu$ g/ml G418 for 14 d until all control parental HaCaT cells had died. To confirm the knockdown of endogenous MPK38, stable clones were isolated, treated with 1  $\mu$ g/ml doxycycline (Sigma, St. Louis, MO), a tetracycline analogue, for 72 h, and subjected to Western blotting by anti-MPK38 antibody.

**Construction of Smad6 Mutants**—Smad6 mutants were generated by PCR as described previously (25). In brief, wild-type human Smad6 was used as the template for amplification with either the Smad6 forward 5'-GATGGATCCATGTTTCAGGTCCAAACGCTCGG-3' or reverse 5'-CTACTCGAGCTATCTGGGGTTGTTGAGGAGG-3' primer, in conjunction with one of the following mutant primers containing alterations in the nucleotide sequence of Smad6: for S364A, forward 5'-GACCTACCTCAGGGCGCCGGCTTCTGCCTGGGC-3', reverse 5'-GCCCAGGCAGAAGCCGGCGCCCTGAGGTAGGTC-3'; for S187A, forward 5'-CGGCTC AAGGAGCGCGCTGGACACGCTGCTG-3', reverse 5'-CAGCAGCGTGTCCAGCGCG CGCTCCTTGAGCCG-3'; for T176A, forward 5'-GAACTCAAACCGTCCGCTACTC GCTGCTGAAG-3', reverse 5'-CTTCAGCAGCGAGTACGCGACGGTTTTGAGTTC-3'.

Seong et al.

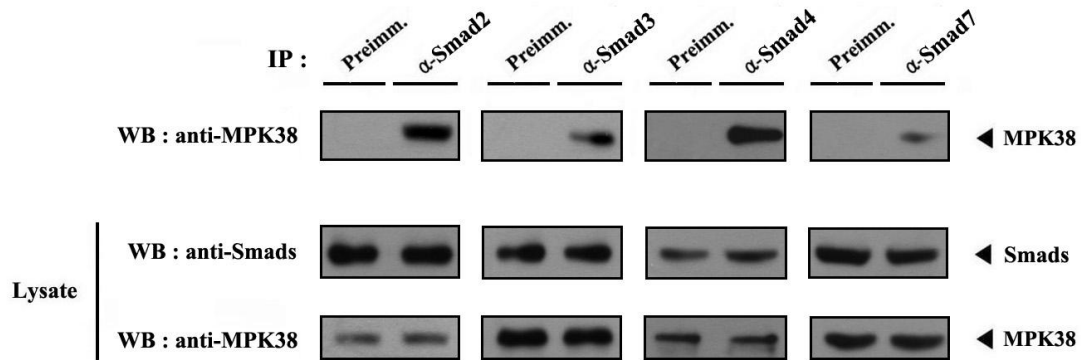

FIG. S1. *In vivo* interaction between MPK38 and Smad proteins. Cell lysates from HEK293 cells were immunoprecipitated with rabbit preimmune serum (preimm.) or the indicated anti-Smad antibodies and blotted with an anti-MPK38 antibody to determine the endogenous association between MPK38 and Smad proteins (*top panels*). The expression levels of Smads and MPK38 in total cell lysates (*Lysate*) were analyzed by Western analysis using anti-Smad and anti-MPK38 antibodies, respectively.

A

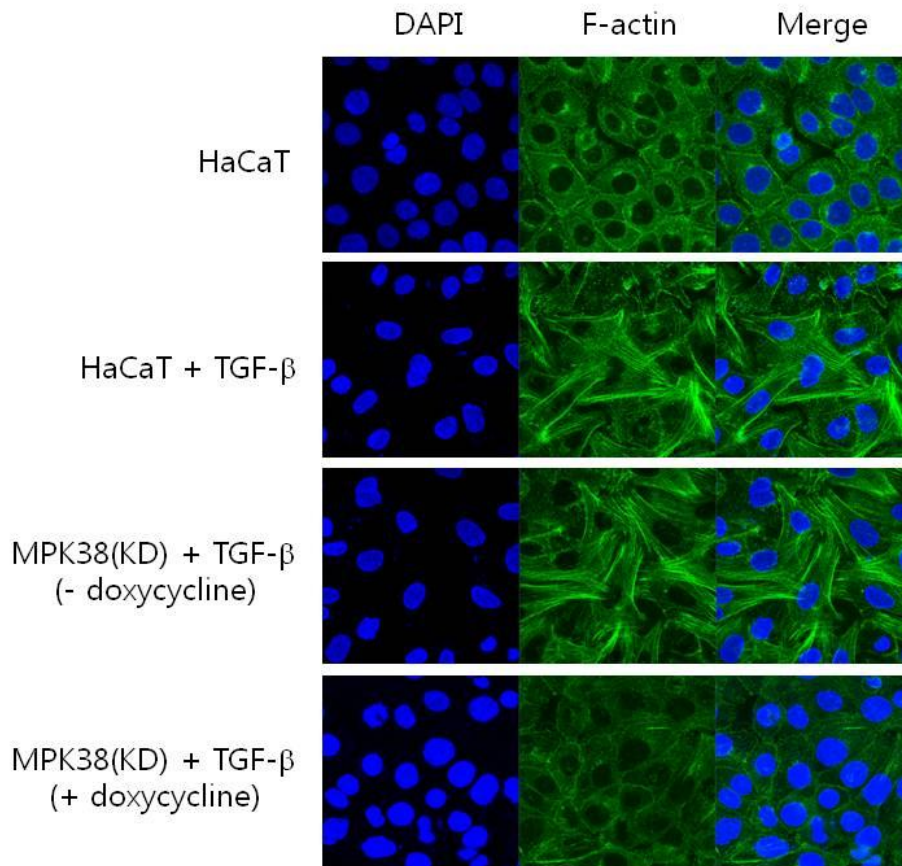

B

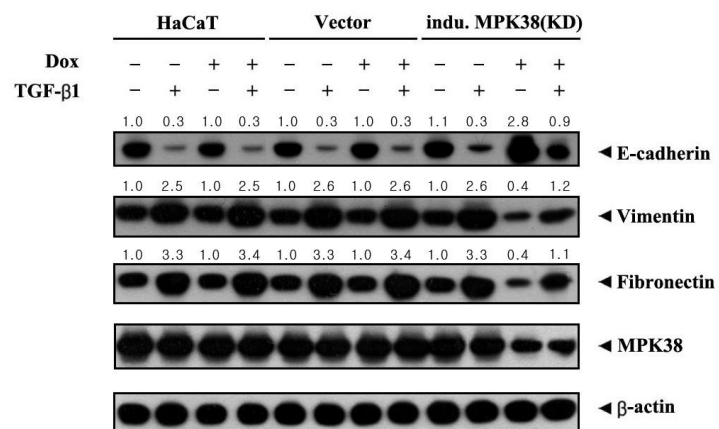

**FIG. S2. Effect of MPK38 on TGF- $\beta$ -induced EMT in HaCaT cells.** Parental HaCaT and inducible MPK38(KD) cells were treated with 10 ng/ml TGF- $\beta$ 1 for 48 h in the presence (+) or absence (-) of doxycycline (1  $\mu$ g/ml, 72 h) and labeled against F-actin (A). Immunofluorescence images revealed stress fiber formations in HaCaT cells in response to TGF- $\beta$ 1. Nuclei were stained by 4',6-diamidino-2-phenylindole (DAPI). Effect of MPK38 knockdown on the expression of EMT markers (E-cadherin, Vimentin, and Fibronectin) was examined by Western blotting (B). Inducible silencing of endogenous MPK38 expression by doxycycline (Dox) was assessed by immunoblotting using an anti-MPK38 antibody (*4th panel*), and  $\beta$ -actin was used as a loading control. *indu.*, inducible.

A

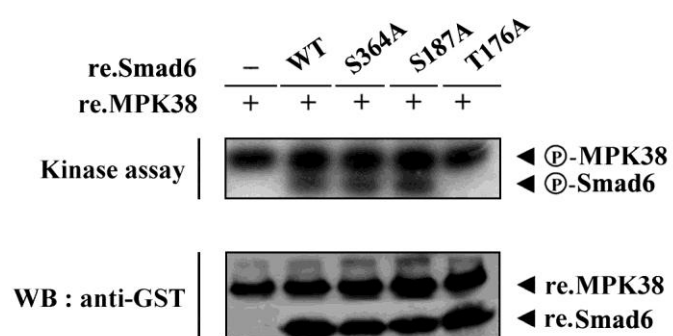

B

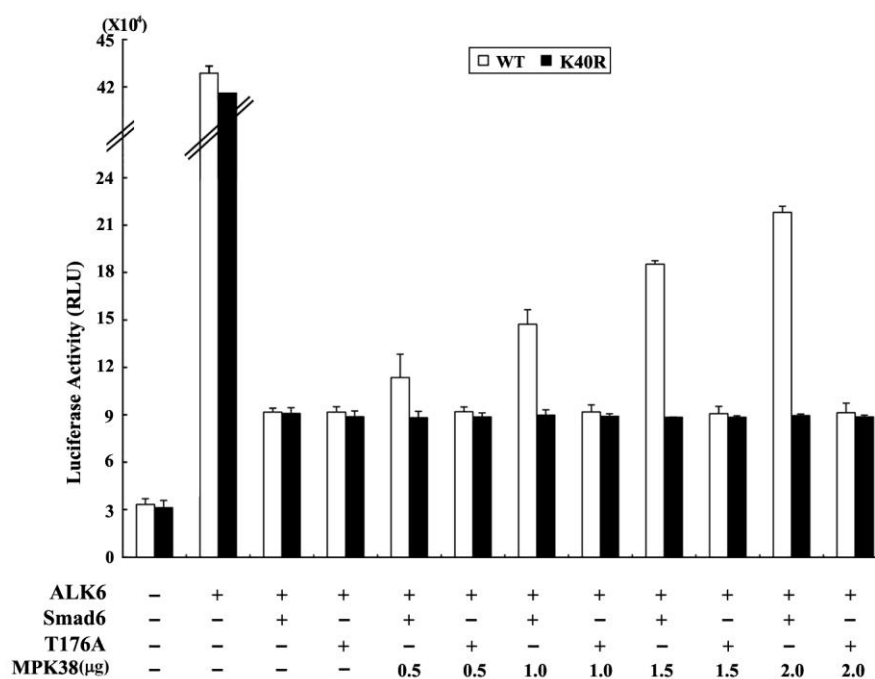

**FIG. S3. Effect of MPK38-mediated phosphorylation of Smad6 at Thr<sup>176</sup> on BMP-induced transcriptional activity.** *A*, Identification of MPK38 phosphorylation sites on Smad6. Purified recombinant MPK38 was assayed for its kinase activity in the presence of kinase buffer containing approximately 3  $\mu\text{g}$  of recombinant wild-type Smad6 and one of its substitution mutants, S364A, S187A, or T176A, as substrates. The *circled P*-MPK38 and *circled P*-Smad6 indicate the autophosphorylated MPK38 and phosphorylated Smad6, respectively. *B*, Murine myoblast C2C12 cells were transfected with 0.3  $\mu\text{g}$  of 6XOSE-Luc plasmid, increasing amounts of wild-type (WT) and kinase-dead (K40R) MPK38, and wild-type and mutant form (T176A) of Smad6 (each 0.1  $\mu\text{g}$ ), as indicated, in the presence or absence of ALK6 (0.5  $\mu\text{g}$ ), a constitutively active form of BMP type 1B receptor. *re.*, recombinant.
